# Supplementary material
Source: PubMed Central journal article supplement (PMC2447632)
Supplement: M709006200_1.pdf [file M709006200_1.pdf]

## SUPPLEMENTAL FIGURES

**Supplemental Figure 1. Oxygenated cholesteryl linoleate in mmLDL and their reduction by ebselen.** Native LDL, mmLDL and mmLDL+ebselen (50  $\mu$ M ebselen, incubated for 1 hour at 37°C with mmLDL) were extracted with hexane/methanol as described in Methods and analyzed by LC-MS using MRM pairs from Table 1. Baseline intensities of the MS signal are artificially altered in order to visually separate individual traces.

**Supplemental Figure 2. Oxygenated cholesteryl linoleate in 15LO-modified native LDL.** Native LDL and 15LO-modified LDL were extracted with hexane/methanol as described in Methods and analyzed by LC-MS using MRM pairs from Table 1. Baseline intensities of the MS signal are artificially altered in order to visually separate individual traces.

**Supplemental Figure 3. Oxygenated cholesteryl linoleate in murine atherosclerotic lesions.** Sections of aorta were isolated from high-fat fed apoE<sup>-/-</sup> and chow fed C57BL/6 mice and subjected to the lipid extraction procedure as detailed in Methods. The extracts were analyzed by LC-MS using MRM pairs from Table 1. The extracts from chow fed C57BL/6 mice did not contain any detectable amounts of oxidized CE and are not shown in the figure.

Supplemental Figure 1

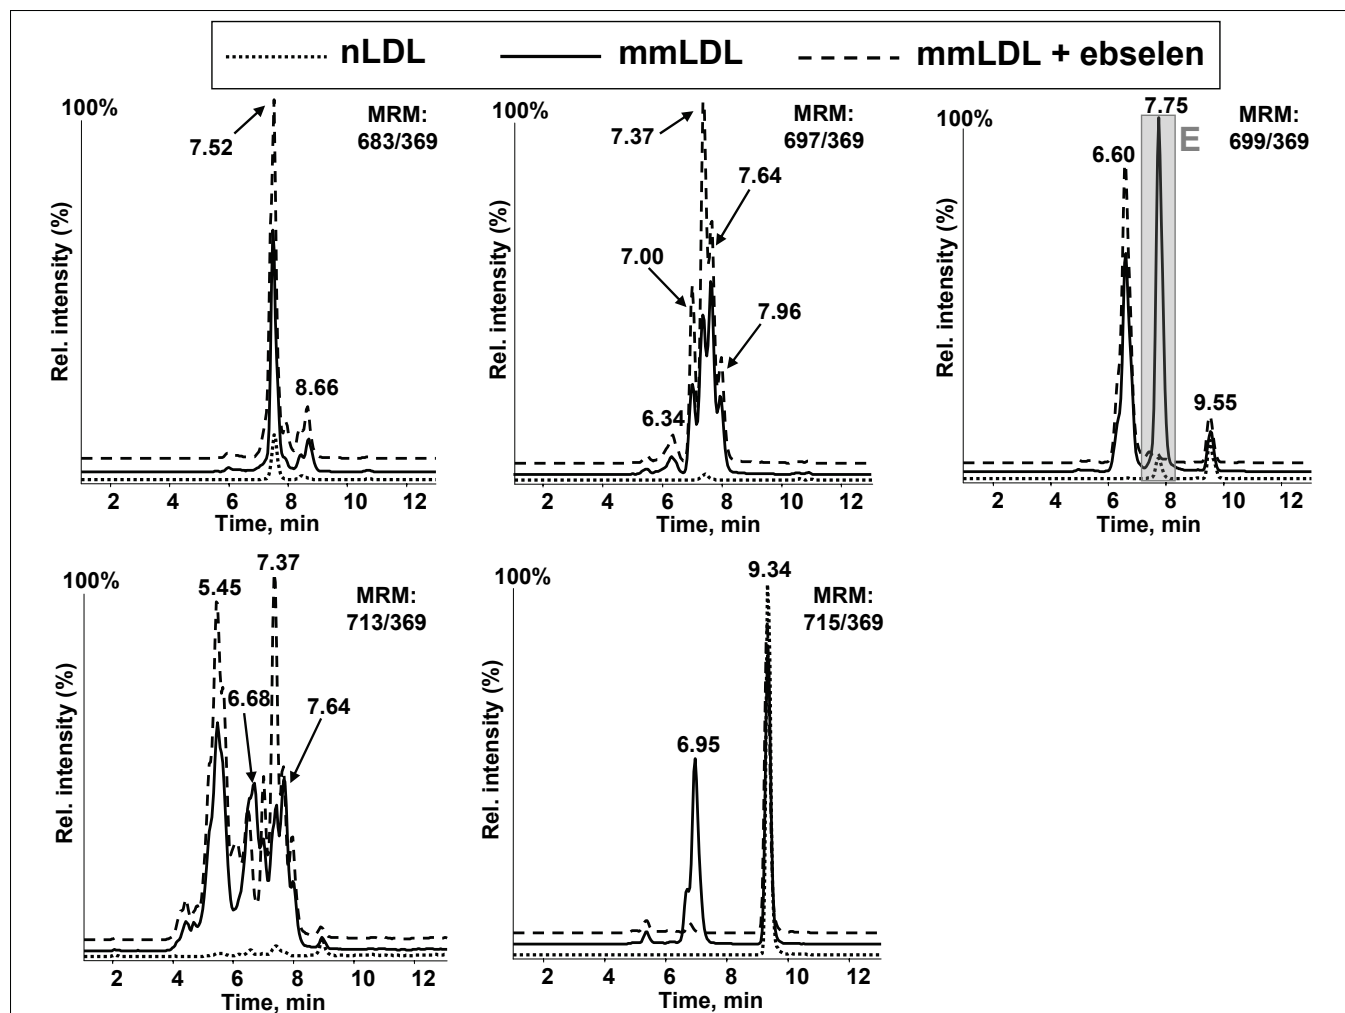

Supplemental Figure 2

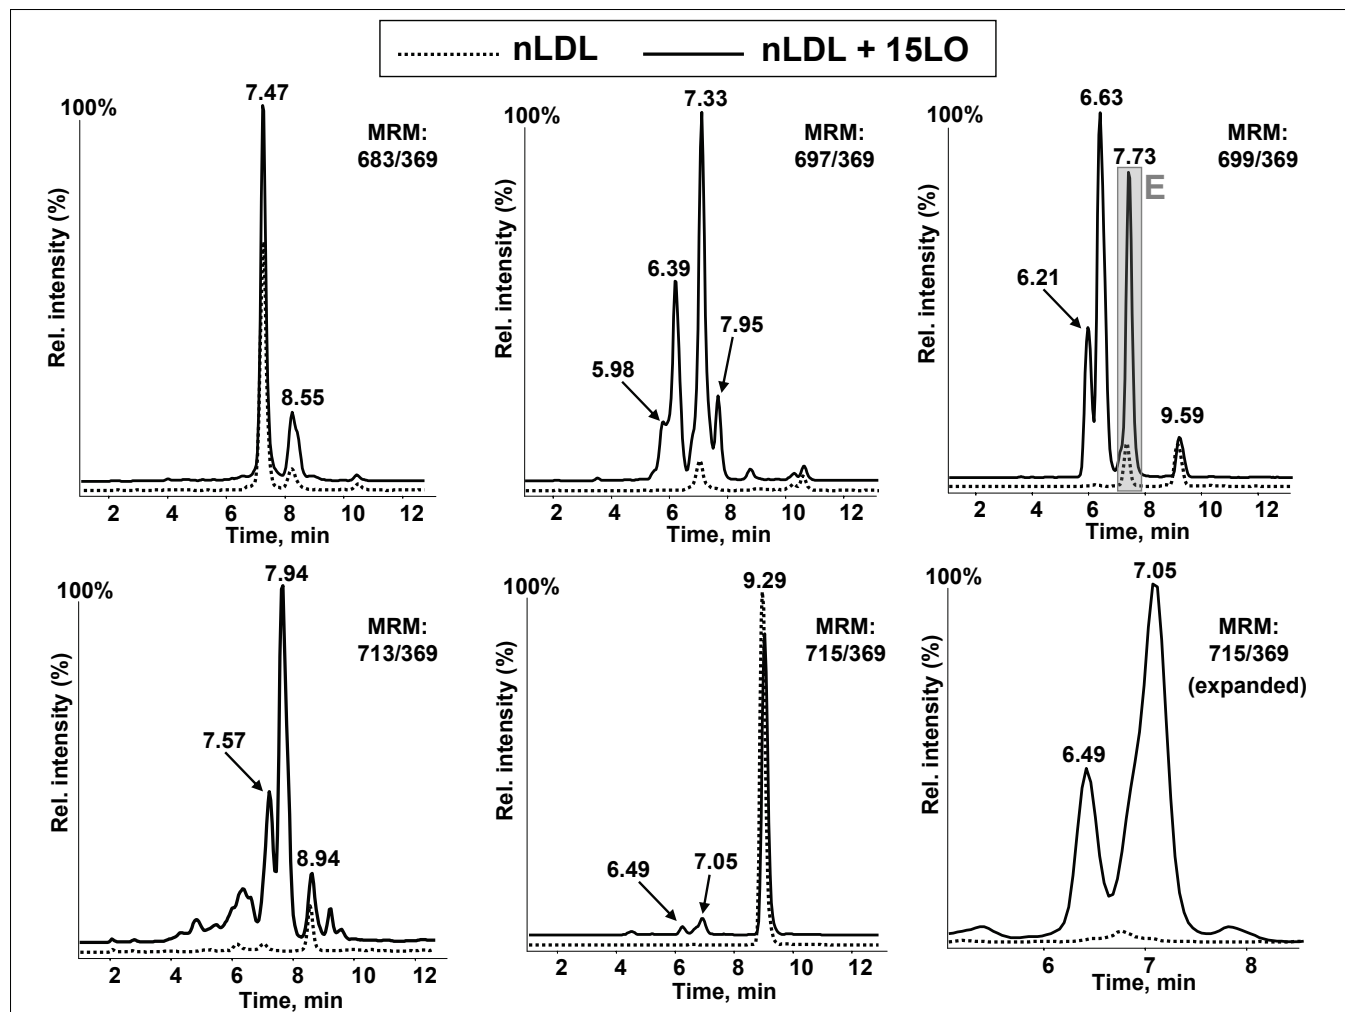

Supplemental Figure 3

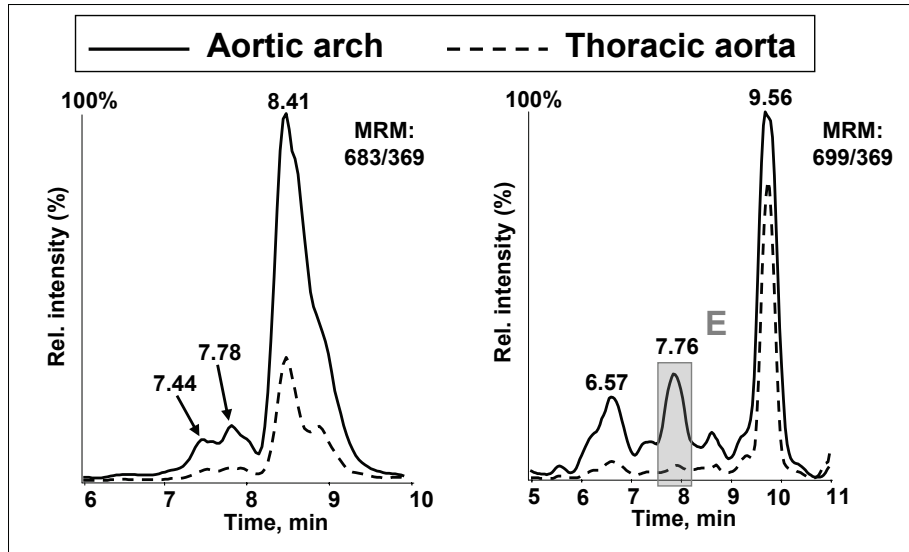

Supplemental Table 1

| Peak | mmLDL/15LO-AACE<br>(mean $\pm$ s.e.) |
|------|--------------------------------------|
| A    | 0.41 $\pm$ 0.24                      |
| B    | 0.96 $\pm$ 0.31                      |
| C    | 0.11 $\pm$ 0.02                      |
| D    | 0.21 $\pm$ 0.10                      |

The retention time / MS peaks A, B, C, and D were quantified in the hexane extracts from 50  $\mu$ g mmLDL (protein concentration) (Fig. 3) and in 2.5  $\mu$ g of 15LO-modified AA-CE (Fig. 7). These amounts of mmLDL and 15LO-AACE induced comparable cytoskeletal rearrangements and ERK1/2 phosphorylation in macrophages. Numbers in the table represent ratios (mean  $\pm$  standard error) of the mmLDL/15LO-AACE peak intensities from three independent experiments.
